# Supplementary material for: Evolutionary dynamics of genome size and content during the adaptive radiation of Heliconiini butterflies
Source: PubMed Central journal article supplement (PMC10497600; doi:10.1038/s41467-023-41412-5), 2023-09-12
Supplement: 41467_2023_41412_MOESM4_ESM.pdf [file 41467_2023_41412_MOESM4_ESM.pdf]

## **Description of Additional Supplementary Files**

File Name: Supplementary Data 1

Description: Description of the assembly and where data were obtained or submitted.

File Name: Supplementary Data 2

Description: Accession number of SRA used to reannotate available and new genome assemblies.

File Name: Supplementary Data 3

Description: Node constraints used and results from MCMCtree analysis.

File Name: Supplementary Data 4

Description: Introgression event detected and their time estimations.

File Name: Supplementary Data 5

Description: Output data deom DCT/BTL introgression analyses.

File Name: Supplementary Data 6

Description: Tables showing the test for convergence in CAFE analyses.

File Name: Supplementary Data 7

Description: Orthologous group expansions/contractions and homology assignment to *D. melanogaster*.

File Name: Supplementary Data 8

Description: Gene family expansions/contraction across Heliconiini.

File Name: Supplementary Data 9

Description: Diversifying selection on scOGs using aBSREL.

File Name: Supplementary Data 10

Description: GO term enrichment analysis showing intersection between Gostats and GOATOOLS.

File Name: Supplementary Data 11

Description: GO term enrichment analysis using GeneMania.

File Name: Supplementary Data 12

Description: CNEs gene enrichment analysis.

File Name: Supplementary Data 13

Description: Genomic spatial enrichment analysis.

File Name: Supplementary Data 14

Description: GO term enrichment analysis of aCNEEs.

File Name: Supplementary Data 15

Description: Cocoonases annotations and dataset description.

File Name: Supplementary Data 16

Description: Cocoonases synteny description.
